# Supplementary material
Source: publisher site journal article supplement (https://www.spandidos-publications.com/4295/downloadSupplementary)
Supplement: Supplementary file 2 [file downloadSupplementary]

## Sheet: Supplementary File 6
Table SIX. The number of detected exons and annotated exons in the siDEK-treated cells.
Sample no.	Detected exons	Annotated exons	Percentage
siCtrl_1st	190.183	367321	0.5178
siCtrl_2nd	189090	367321	0.5148
siCtrl_3rd	198503	367321	0.5404
siDEK_1st	191984	367321	0.5227
siDEK_2nd	190705	367321	0.5192
siDEK_3rd	194091	367321	0.5284
Total	229508	367321	0.6248
